# Supplementary material
Source: MDPI journal article supplement (https://www.mdpi.com/2073-4441/14/9/1445)
Supplement: s1 [file s1]

Table S1. Speciation analysis test results (mg/kg).

| Site  | Depth(m) | Fraction | Cr    | Mn     | Cu    | Zn     | Cd   | Pb     |
|-------|----------|----------|-------|--------|-------|--------|------|--------|
| #1-7  | 0-0.5    | F1       | 0.10  | 36.44  | 0.05  | 0.41   | 2.28 | 28.17  |
|       |          | F2       | 1.10  | 170.60 | 0.31  | 0.98   | 1.65 | 118.99 |
|       |          | F3       | 3.81  | 20.98  | 0.58  | 3.10   | 4.53 | 40.80  |
|       |          | F4       | 73.02 | 252.10 | 7.11  | 153.16 | 0.27 | 205.18 |
|       | 0.5-1    | F1       | 0.37  | 44.63  | 0.03  | 0.18   | 0.18 | 0.62   |
|       |          | F2       | 0.19  | 220.90 | 0.23  | 0.61   | 0.11 | 4.87   |
|       |          | F3       | 1.55  | 27.22  | 0.12  | 0.49   | 0.03 | 0.17   |
|       |          | F4       | 61.27 | 420.68 | 1.97  | 149.79 | 1.07 | 69.79  |
|       | 1-2      | F1       | 0.24  | 48.04  | 0.04  | 0.19   | 0.72 | 9.52   |
|       |          | F2       | 0.48  | 133.51 | 0.26  | 0.63   | 0.35 | 11.39  |
|       |          | F3       | 1.06  | 22.58  | 0.19  | 0.64   | 0.31 | 0.27   |
|       |          | F4       | 68.73 | 182.97 | 7.90  | 489.79 | 0.61 | 81.21  |
|       | 2-3      | F1       | 0.21  | 61.12  | 0.04  | 0.61   | 0.27 | 1.02   |
|       |          | F2       | 0.93  | 162.36 | 0.35  | 1.49   | 0.15 | 5.43   |
|       |          | F3       | 3.69  | 27.87  | 0.51  | 3.32   | 1.10 | 6.80   |
|       |          | F4       | 55.97 | 201.80 | 3.71  | 65.97  | 0.31 | 75.79  |
| #1-8  | 0-0.5    | F1       | 0.28  | 48.14  | 0.04  | 0.14   | 1.83 | 46.59  |
|       |          | F2       | 0.18  | 118.83 | 0.18  | 0.48   | 0.77 | 82.01  |
|       |          | F3       | 1.48  | 17.66  | 0.14  | 0.66   | 0.60 | 0.92   |
|       |          | F4       | 65.08 | 372.80 | 12.06 | 324.97 | 0.83 | 195.73 |
|       | 0.5-1    | F1       | 0.22  | 43.30  | 0.03  | 0.21   | 1.09 | 17.48  |
|       |          | F2       | 0.46  | 121.27 | 0.19  | 0.42   | 0.56 | 15.13  |
|       |          | F3       | 1.31  | 21.35  | 0.14  | 0.52   | 0.35 | 1.73   |
|       |          | F4       | 93.80 | 294.97 | 13.02 | 352.02 | 2.11 | 137.64 |
|       | 1-2      | F1       | 0.29  | 49.66  | 0.04  | 0.14   | 0.21 | 2.58   |
|       |          | F2       | 0.17  | 308.54 | 0.40  | 0.43   | 0.11 | 14.24  |
|       |          | F3       | 1.35  | 28.95  | 0.16  | 0.47   | 0.10 | 0.33   |
|       |          | F4       | 72.70 | 382.79 | 8.28  | 177.92 | 0.84 | 80.66  |
|       | 2-3      | F1       | 0.10  | 26.13  | 0.04  | 0.31   | 0.89 | 10.47  |
|       |          | F2       | 0.21  | 159.02 | 0.26  | 0.57   | 0.73 | 26.54  |
|       |          | F3       | 1.72  | 28.09  | 0.16  | 0.58   | 0.46 | 2.52   |
|       |          | F4       | 82.81 | 305.79 | 14.27 | 239.82 | 1.02 | 157.29 |
| #1-9  | 0-0.5    | F1       | 0.37  | 105.33 | 0.15  | 0.45   | 0.30 | 2.60   |
|       |          | F2       | 0.25  | 184.60 | 0.85  | 1.01   | 0.12 | 9.81   |
|       |          | F3       | 2.06  | 24.72  | 0.14  | 1.42   | 0.14 | 0.21   |
|       |          | F4       | 90.36 | 354.24 | 13.57 | 108.24 | 0.59 | 83.24  |
|       | 0.5-1    | F1       | 0.26  | 46.09  | 0.03  | 0.28   | 0.10 | 0.49   |
|       |          | F2       | 0.49  | 112.47 | 0.24  | 0.42   | 0.05 | 2.55   |
|       |          | F3       | 1.46  | 21.14  | 0.11  | 0.69   | 0.03 | 0.17   |
|       |          | F4       | 93.23 | 362.25 | 16.24 | 175.25 | 0.77 | 73.25  |
|       | 1-2      | F1       | 0.31  | 46.98  | 0.03  | 0.13   | 0.06 | 0.45   |
|       |          | F2       | 0.19  | 146.91 | 0.25  | 0.34   | 0.02 | 2.61   |
|       |          | F3       | 1.73  | 21.67  | 0.14  | 0.56   | 0.01 | 0.17   |
|       |          | F4       | 89.24 | 287.24 | 18.33 | 234.24 | 1.36 | 63.32  |
|       | 2-3      | F1       | 0.12  | 31.27  | 0.05  | 0.18   | 0.07 | 0.52   |
|       |          | F2       | 0.50  | 157.66 | 0.28  | 0.55   | 0.08 | 4.90   |
|       |          | F3       | 1.57  | 34.27  | 0.20  | 0.64   | 0.09 | 0.17   |
|       |          | F4       | 94.21 | 413.24 | 19.24 | 274.22 | 2.14 | 142.23 |
| #1-10 | 0-0.5    | F1       | 0.22  | 54.54  | 0.03  | 0.15   | 0.04 | 0.33   |
|       |          | F2       | 0.46  | 195.12 | 0.24  | 0.38   | 0.02 | 2.27   |
|       |          | F3       | 1.74  | 29.05  | 0.18  | 0.84   | 0.02 | 0.21   |
|       |          | F4       | 58.23 | 195.25 | 5.68  | 103.53 | 0.28 | 57.25  |
|       | 0.5-1    | F1       | 0.21  | 47.27  | 0.03  | 0.15   | 0.04 | 0.27   |
|       |          | F2       | 0.44  | 266.76 | 0.31  | 0.46   | 0.02 | 2.02   |
|       |          | F3       | 1.25  | 26.27  | 0.16  | 0.46   | 0.02 | 0.18   |

|       |       |    |       |        |       |        |      |        |
|-------|-------|----|-------|--------|-------|--------|------|--------|
|       |       | F4 | 54.25 | 94.24  | 8.24  | 197.22 | 0.20 | 50.22  |
|       |       | F1 | 0.21  | 78.01  | 0.03  | 0.55   | 0.04 | 0.32   |
|       |       | F2 | 0.95  | 141.12 | 0.21  | 0.42   | 0.02 | 2.00   |
|       |       | F3 | 3.73  | 32.19  | 0.89  | 4.04   | 0.44 | 6.86   |
|       | 1-2   | F4 | 87.12 | 304.23 | 12.02 | 335.13 | 0.13 | 61.24  |
|       |       | F1 | 0.09  | 144.95 | 0.19  | 0.44   | 0.05 | 0.60   |
|       |       | F2 | 0.92  | 53.21  | 0.61  | 1.05   | 0.03 | 2.86   |
|       |       | F3 | 3.75  | 22.67  | 0.61  | 3.51   | 1.31 | 4.34   |
| #1-11 | 2-3   | F4 | 92.23 | 360.22 | 15.22 | 199.23 | 0.52 | 63.21  |
|       |       | F1 | 0.14  | 81.51  | 0.06  | 0.30   | 0.11 | 2.04   |
|       |       | F2 | 0.97  | 280.57 | 0.47  | 1.13   | 0.06 | 4.51   |
|       |       | F3 | 3.42  | 22.52  | 0.67  | 3.99   | 3.34 | 6.49   |
|       | 0-0.5 | F4 | 80.21 | 251.21 | 11.02 | 189.32 | 1.32 | 64.12  |
|       |       | F1 | 0.15  | 106.00 | 0.10  | 0.76   | 0.07 | 0.25   |
|       |       | F2 | 0.42  | 187.33 | 0.68  | 2.26   | 0.03 | 1.83   |
|       |       | F3 | 1.56  | 38.83  | 0.30  | 0.74   | 0.02 | 0.20   |
|       | 0.5-1 | F4 | 91.21 | 432.53 | 19.50 | 182.02 | 0.46 | 64.21  |
|       |       | F1 | 0.23  | 78.17  | 0.05  | 0.52   | 0.08 | 0.31   |
|       |       | F2 | 0.95  | 208.83 | 0.16  | 1.23   | 0.05 | 2.43   |
|       |       | F3 | 3.59  | 24.97  | 0.65  | 3.54   | 3.23 | 5.33   |
|       | 1-2   | F4 | 90.24 | 308.21 | 10.09 | 383.21 | 0.88 | 70.24  |
|       |       | F1 | 0.11  | 59.49  | 0.09  | 0.32   | 0.13 | 0.41   |
|       |       | F2 | 0.19  | 135.99 | 0.40  | 0.98   | 0.10 | 3.31   |
|       |       | F3 | 1.10  | 38.21  | 0.39  | 0.61   | 0.04 | 0.25   |
| #1-12 | 2-3   | F4 | 88.21 | 377.24 | 14.21 | 95.25  | 0.10 | 61.21  |
|       |       | F1 | 0.17  | 37.25  | 0.04  | 0.36   | 0.08 | 0.46   |
|       |       | F2 | 0.40  | 248.98 | 0.06  | 0.98   | 0.07 | 3.13   |
|       |       | F3 | 2.12  | 28.31  | 0.12  | 0.78   | 0.02 | 0.19   |
|       | 0-0.5 | F4 | 68.21 | 321.21 | 2.68  | 168.25 | 0.10 | 64.21  |
|       |       | F1 | 0.27  | 52.11  | 0.03  | 0.16   | 0.06 | 0.34   |
|       |       | F2 | 0.18  | 207.71 | 0.29  | 0.41   | 0.03 | 2.53   |
|       |       | F3 | 1.17  | 25.48  | 0.16  | 0.46   | 0.01 | 0.18   |
|       | 0.5-1 | F4 | 78.35 | 405.21 | 8.24  | 158.21 | 0.17 | 53.21  |
|       |       | F1 | 0.09  | 65.27  | 0.06  | 0.53   | 0.06 | 0.38   |
|       |       | F2 | 0.97  | 155.46 | 0.51  | 0.93   | 0.05 | 2.81   |
|       |       | F3 | 3.47  | 35.06  | 0.99  | 4.43   | 3.47 | 7.28   |
| #2-2  | 1-2   | F4 | 95.21 | 403.01 | 19.21 | 251.21 | 0.05 | 82.25  |
|       |       | F1 | 0.08  | 44.49  | 0.06  | 0.24   | 0.03 | 0.37   |
|       |       | F2 | 0.17  | 127.82 | 0.46  | 0.71   | 0.03 | 2.84   |
|       |       | F3 | 1.38  | 44.50  | 0.23  | 5.09   | 0.25 | 0.21   |
|       | 2-3   | F4 | 83.21 | 431.21 | 17.22 | 153.21 | 0.48 | 85.45  |
|       |       | F1 | 0.16  | 50.66  | 0.04  | 0.15   | 0.30 | 5.30   |
|       |       | F2 | 0.15  | 175.73 | 0.24  | 0.35   | 0.14 | 20.91  |
|       |       | F3 | 1.08  | 26.74  | 0.17  | 0.40   | 0.07 | 0.39   |
|       | 0-0.5 | F4 | 71.94 | 443.19 | 5.90  | 64.08  | 2.21 | 149.23 |
|       |       | F1 | 0.15  | 64.56  | 0.07  | 0.23   | 0.21 | 5.10   |
|       |       | F2 | 1.03  | 196.40 | 0.44  | 0.93   | 0.11 | 19.25  |
|       |       | F3 | 3.73  | 20.60  | 0.49  | 3.28   | 3.26 | 3.93   |
| #2-3  | 0.5-1 | F4 | 53.93 | 332.58 | 22.04 | 114.31 | 0.18 | 89.07  |
|       |       | F1 | 0.15  | 48.09  | 0.02  | 0.16   | 0.13 | 3.68   |
|       |       | F2 | 2.49  | 231.15 | 0.52  | 1.02   | 0.02 | 12.02  |
|       |       | F3 | 4.02  | 43.22  | 0.50  | 4.10   | 0.52 | 8.21   |
|       | 1-2   | F4 | 65.69 | 437.84 | 7.59  | 144.51 | 0.18 | 89.62  |
|       |       | F1 | 0.19  | 49.28  | 0.03  | 0.45   | 0.46 | 14.93  |
|       |       | F2 | 0.47  | 223.85 | 0.29  | 1.10   | 0.19 | 41.81  |
|       |       | F3 | 2.87  | 39.00  | 0.13  | 1.42   | 0.09 | 0.33   |
|       | 2-3   | F4 | 71.06 | 368.22 | 3.14  | 112.25 | 0.53 | 132.63 |
|       |       | F1 | 0.18  | 94.62  | 0.10  | 0.07   | 0.08 | 0.89   |

|      |       |    |        |        |       |        |       |         |
|------|-------|----|--------|--------|-------|--------|-------|---------|
|      |       | F2 | 0.52   | 185.21 | 0.22  | 1.20   | 0.15  | 14.21   |
|      |       | F3 | 5.20   | 23.21  | 1.21  | 1.54   | 1.02  | 8.21    |
|      |       | F4 | 76.79  | 223.45 | 4.74  | 63.04  | 0.43  | 44.74   |
|      |       |    |        |        |       |        |       |         |
|      | 0.5-1 | F1 | 0.14   | 39.47  | 0.05  | 0.20   | 0.04  | 0.32    |
|      |       | F2 | 1.06   | 183.92 | 0.18  | 0.64   | 0.04  | 3.13    |
|      |       | F3 | 3.78   | 22.28  | 0.26  | 3.46   | 3.69  | 16.33   |
|      |       | F4 | 45.95  | 79.39  | 0.06  | 75.49  | 1.03  | 84.51   |
|      | 1-2   | F1 | 0.17   | 114.66 | 0.22  | 1.29   | 0.08  | 0.39    |
|      |       | F2 | 0.97   | 215.38 | 0.49  | 3.68   | 0.04  | 2.36    |
|      |       | F3 | 2.91   | 23.92  | 0.79  | 3.75   | 2.83  | 6.71    |
|      |       | F4 | 39.67  | 34.24  | 4.67  | 57.56  | 0.29  | 73.43   |
|      | 2-3   | F1 | 0.11   | 59.93  | 0.03  | 0.23   | 0.06  | 0.41    |
|      |       | F2 | 1.21   | 107.21 | 0.25  | 0.55   | 0.01  | 1.20    |
|      |       | F3 | 10.33  | 21.21  | 0.68  | 1.21   | 0.24  | 16.46   |
|      |       | F4 | 37.06  | 247.40 | 2.31  | 66.61  | 0.08  | 51.57   |
| #2-4 | 0-0.5 | F1 | 0.20   | 66.14  | 0.06  | 0.35   | 0.56  | 24.70   |
|      |       | F2 | 1.07   | 127.24 | 0.17  | 0.96   | 0.24  | 46.82   |
|      |       | F3 | 3.35   | 20.49  | 0.52  | 3.01   | 2.21  | 23.84   |
|      |       | F4 | 108.39 | 352.06 | 8.17  | 205.12 | 0.43  | 695.81  |
|      | 0.5-1 | F1 | 0.21   | 101.17 | 0.06  | 0.26   | 0.07  | 0.47    |
|      |       | F2 | 0.46   | 199.13 | 0.48  | 0.90   | 0.03  | 2.28    |
|      |       | F3 | 1.50   | 26.73  | 0.21  | 0.66   | 0.01  | 0.16    |
|      |       | F4 | 102.31 | 325.25 | 10.08 | 192.66 | 5.61  | 218.78  |
|      | 1-2   | F1 | 0.19   | 123.19 | 0.09  | 0.56   | 0.10  | 0.53    |
|      |       | F2 | 0.94   | 222.79 | 0.55  | 2.03   | 0.05  | 3.21    |
|      |       | F3 | 2.88   | 24.07  | 0.75  | 3.51   | 3.10  | 7.70    |
|      |       | F4 | 85.75  | 430.61 | 9.24  | 166.45 | 1.07  | 59.14   |
|      | 2-3   | F1 | 0.09   | 49.35  | 0.09  | 0.58   | 0.07  | 0.33    |
|      |       | F2 | 1.00   | 183.60 | 0.50  | 1.57   | 0.06  | 2.89    |
|      |       | F3 | 3.43   | 26.69  | 0.64  | 3.78   | 3.34  | 11.62   |
|      |       | F4 | 81.49  | 373.45 | 7.08  | 92.57  | 0.59  | 25.98   |
| #2-5 | 0-0.5 | F1 | 0.09   | 74.77  | 0.22  | 0.63   | 3.56  | 74.21   |
|      |       | F2 | 1.20   | 142.25 | 0.65  | 2.21   | 0.73  | 65.24   |
|      |       | F3 | 2.24   | 24.22  | 0.89  | 5.24   | 17.24 | 231.21  |
|      |       | F4 | 68.74  | 204.01 | 4.43  | 106.84 | 6.99  | 1156.91 |
|      | 0.5-1 | F1 | 0.16   | 124.21 | 0.10  | 0.79   | 1.15  | 95.16   |
|      |       | F2 | 0.56   | 287.67 | 0.79  | 3.28   | 0.88  | 140.74  |
|      |       | F3 | 2.78   | 40.56  | 0.43  | 2.48   | 1.14  | 25.24   |
|      |       | F4 | 77.90  | 199.11 | 13.96 | 191.16 | 0.56  | 409.24  |
|      | 1-2   | F1 | 0.15   | 134.61 | 0.20  | 6.67   | 3.47  | 108.98  |
|      |       | F2 | 1.21   | 354.54 | 0.21  | 4.51   | 1.05  | 153.21  |
|      |       | F3 | 5.20   | 108.21 | 1.20  | 5.50   | 18.55 | 54.25   |
|      |       | F4 | 67.31  | 230.25 | 9.75  | 164.50 | 4.13  | 583.01  |
|      | 2-3   | F1 | 0.09   | 37.82  | 0.08  | 0.22   | 0.04  | 0.40    |
|      |       | F2 | 0.18   | 169.00 | 0.50  | 0.76   | 0.04  | 2.85    |
|      |       | F3 | 2.00   | 51.92  | 0.25  | 4.42   | 0.02  | 0.19    |
|      |       | F4 | 79.02  | 200.50 | 28.54 | 95.38  | 0.06  | 27.67   |
| #3-5 | 0-0.5 | F1 | 0.15   | 53.47  | 0.03  | 0.29   | 0.14  | 1.59    |
|      |       | F2 | 1.03   | 103.56 | 0.28  | 1.39   | 0.08  | 6.89    |
|      |       | F3 | 3.30   | 19.89  | 0.53  | 3.03   | 1.12  | 10.13   |
|      |       | F4 | 67.84  | 339.46 | 3.86  | 74.96  | 0.35  | 90.62   |
|      | 0.5-1 | F1 | 0.09   | 49.38  | 0.02  | 0.22   | 0.22  | 6.50    |
|      |       | F2 | 2.20   | 109.24 | 0.15  | 1.03   | 0.09  | 12.21   |
|      |       | F3 | 7.24   | 34.21  | 0.36  | 5.23   | 0.95  | 152.21  |
|      |       | F4 | 65.21  | 345.09 | 1.46  | 97.33  | 0.23  | 539.83  |
|      | 1-2   | F1 | 0.19   | 59.21  | 0.03  | 0.26   | 0.17  | 3.25    |
|      |       | F2 | 0.15   | 244.46 | 0.28  | 0.53   | 0.08  | 17.71   |
|      |       | F3 | 1.32   | 27.57  | 0.12  | 0.54   | 0.06  | 0.28    |

|      |       |    |        |        |       |        |      |        |
|------|-------|----|--------|--------|-------|--------|------|--------|
|      | 2-3   | F4 | 62.36  | 203.57 | 5.22  | 146.29 | 1.55 | 116.10 |
|      |       | F1 | 0.14   | 39.51  | 0.02  | 0.25   | 0.30 | 19.68  |
|      |       | F2 | 0.49   | 249.03 | 0.27  | 0.62   | 0.05 | 3.38   |
|      |       | F3 | 1.61   | 31.00  | 0.13  | 0.54   | 0.17 | 0.45   |
|      |       | F4 | 99.62  | 560.30 | 14.82 | 351.11 | 2.52 | 251.86 |
| #3-6 | 0-0.5 | F1 | 0.12   | 29.39  | 0.04  | 0.46   | 0.01 | 0.22   |
|      |       | F2 | 1.10   | 200.37 | 0.23  | 0.78   | 0.02 | 2.32   |
|      |       | F3 | 3.54   | 20.92  | 0.61  | 3.83   | 0.07 | 4.34   |
|      |       | F4 | 95.37  | 310.59 | 13.46 | 91.01  | 0.07 | 53.98  |
|      | 0.5-1 | F1 | 0.35   | 66.16  | 0.04  | 0.19   | 0.06 | 0.28   |
|      |       | F2 | 1.06   | 240.97 | 0.33  | 0.57   | 0.03 | 2.33   |
|      |       | F3 | 3.39   | 23.26  | 0.53  | 3.25   | 1.07 | 3.96   |
|      |       | F4 | 78.83  | 233.23 | 6.79  | 88.32  | 0.58 | 54.58  |
|      | 1-2   | F1 | 0.27   | 48.25  | 0.07  | 0.17   | 0.10 | 1.02   |
|      |       | F2 | 1.03   | 97.26  | 0.26  | 0.66   | 0.05 | 4.35   |
|      |       | F3 | 3.54   | 18.98  | 0.56  | 3.35   | 1.15 | 5.76   |
|      |       | F4 | 86.75  | 374.24 | 5.39  | 57.63  | 0.21 | 71.70  |
|      | 2-3   | F1 | 0.14   | 23.17  | 0.04  | 0.20   | 0.02 | 0.37   |
|      |       | F2 | 0.48   | 352.44 | 0.29  | 0.64   | 0.19 | 10.49  |
|      |       | F3 | 1.23   | 31.91  | 0.17  | 0.51   | 0.03 | 0.25   |
|      |       | F4 | 105.29 | 127.09 | 18.71 | 55.03  | 0.23 | 70.29  |
| #3-7 | 0-0.5 | F1 | 0.21   | 73.64  | 0.06  | 0.28   | 0.92 | 43.90  |
|      |       | F2 | 1.03   | 113.47 | 0.07  | 1.07   | 0.42 | 74.12  |
|      |       | F3 | 3.32   | 20.60  | 0.56  | 3.23   | 0.94 | 37.76  |
|      |       | F4 | 137.18 | 803.86 | 23.78 | 124.94 | 0.38 | 159.60 |
|      | 0.5-1 | F1 | 0.25   | 72.68  | 0.05  | 0.20   | 0.11 | 1.31   |
|      |       | F2 | 1.04   | 190.19 | 0.34  | 0.67   | 0.04 | 5.47   |
|      |       | F3 | 3.15   | 20.48  | 0.53  | 2.87   | 3.03 | 5.97   |
|      |       | F4 | 146.91 | 722.85 | 31.28 | 159.74 | 0.73 | 156.16 |
|      | 1-2   | F1 | 0.23   | 76.34  | 0.07  | 0.40   | 0.22 | 4.46   |
|      |       | F2 | 1.02   | 123.01 | 0.44  | 1.90   | 0.09 | 14.21  |
|      |       | F3 | 3.53   | 28.70  | 0.66  | 3.79   | 1.67 | 13.30  |
|      |       | F4 | 96.79  | 440.30 | 9.42  | 161.67 | 0.46 | 114.27 |
|      | 2-3   | F1 | 0.14   | 70.67  | 0.04  | 0.03   | 0.05 | 0.58   |
|      |       | F2 | 1.21   | 134.24 | 0.54  | 12.11  | 0.14 | 4.22   |
|      |       | F3 | 5.03   | 42.23  | 3.32  | 5.23   | 1.05 | 8.23   |
|      |       | F4 | 83.92  | 179.31 | 17.12 | 233.38 | 0.50 | 62.30  |
